# Supplementary material
Source: publisher site journal article supplement (https://static.cambridge.org/content/id/urn:cambridge.org:id:article:S0143814X20000215/resource/name/S0143814X20000215supp002.docx)
Supplement: Supplementary file 1 [file S0143814X20000215supp002.docx]

**Appendix A. Summary of Data Collection**

Position vacancy data were constructed from two public release files: Office of Personnel Management (OPM) personnel data obtained through the Central Personnel Data File (CPDF) covering PAS appointees confirmed during the first Bush and Clinton administrations, from 1989 to 2001; and Government Accountability Office (GAO) data supporting the April 1994 report, “Political Appointees: Turnover Rates in Executive Schedule Positions Requiring Senate Confirmation,” (GAO/GGD-94-115FS, 1981-1990) covering PAS appointees confirmed, from 1981 to 1990. Using nomination and confirmation data drawn from the Senate record accessed via Thomas.gov, the research team verified and expanded the data file to cover the 1989-2015 time series. A full succession of appointments to each PAS position was assembled using Congressional Research Service reports published each Congress (e.g., Hogue 2003), annual *Congressional Quarterly Staff Directory*, contemporaneous media coverage obtained through LexisNexis, and a growing range of online resources.

Appointee departure dates presented the greatest difficulty, as reliable public data are not available (Dull and Roberts 2009: 449). A number of PAS positions are omitted, including U.S. attorney and U.S. marshal positions in the Department of Justice; Foreign Service and diplomatic positions in the Department of State; officer corps positions in the civilian uniformed services of the National Oceanic and Atmospheric Administration in the Department of Commerce, and of the Public Health Service in the Department of Health and Human Services; and the officer corps in the military services. Excluded from the analysis are multilateral banking organizations, legislative branch agencies, the Appalachian Regional Commission, and the Court Services and Offender Supervision Agency for the District of Columbia (Hogue 2003: 37). Recess appointments are included; “acting” appointees are not.

**Appendix B. Diagnostics**

**Figure B1. Countfit Package (Stata) Results**

**Table B1. Pairwise Correlation Coefficients for RCL vs. CJ Agency Ideology Estimates**

|  | RCL | CJ_Clinton1 | CJ_Clinton2 | CJ_GWB1 | CJ_GWB2 | CJ_Obama | CJ_AVG |
| --- | --- | --- | --- | --- | --- | --- | --- |
| RCL | 1 |  |  |  |  |  |  |
| CJ_Clinton1 | 0.6005 | 1 |  |  |  |  |  |
| CJ_Clinton2 | 0.7356 | 0.7025 | 1 |  |  |  |  |
| CJ_GWB1 | 0.288 | 0.0889 | 0.3373 | 1 |  |  |  |
| CJ_GWB2 | 0.4616 | 0.458 | 0.3542 | 0.6237 | 1 |  |  |
| CJ_Obama | 0.7593 | 0.721 | 0.706 | 0.089 | 0.2502 | 1 |  |
| CJ_AVG | 0.7267 | 0.7282 | 0.8457 | 0.6701 | 0.727 | 0.6626 | 1 |

RCL = Richardson, Clinton, and Lewis (2018); CJ = Chen and Johnson (2015)

**Table B2. Robustness Checks Using Dynamic Agency Ideology Estimates**

| **Binomial Portion** | **β** | **β** | **β** | **β** |
| --- | --- | --- | --- | --- |
| Chair-Agency Divergence | -0.289** | -0.289** | -0.145*** |  |
|  | (0.108) | (0.108) | (0.0400) |  |
| Chair-Agency Divergence - Squared | -0.641*** | -0.641*** | -0.449*** |  |
|  | (0.177) | (0.177) | (0.108) |  |
| Majority Median-Agency Divergence | 0.612+ | 0.612+ |  | -0.171 |
|  | (0.362) | (0.362) |  | (0.172) |
| Majority Median-Agency Divergence - Squared | 1.010+ | 1.010+ |  | -0.275 |
|  | (0.604) | (0.604) |  | (0.374) |
| President-Agency Divergence | 0.0675 | 0.0675 |  |  |
|  | (0.0849) | (0.0849) |  |  |
| High Status | -0.774*** | -0.774*** | -0.769*** | -0.757*** |
|  | (0.0996) | (0.0996) | (0.0957) | (0.0958) |
| **Logit Portion** |  |  |  |  |
| Chair-Agency Divergence | -2.745*** | -2.745*** | -1.708*** |  |
|  | (0.464) | (0.464) | (0.192) |  |
| Chair-Agency Divergence - Squared | -2.289*** | -2.289*** | -1.547*** |  |
|  | (0.402) | (0.402) | (0.361) |  |
| Majority Median-Agency Divergence | 2.932** | 2.932** |  | -1.162* |
|  | (0.898) | (0.898) |  | (0.493) |
| Majority Median-Agency Divergence - Squared | 3.641*** | 3.641*** |  | -0.986 |
|  | (1.064) | (1.064) |  | (0.856) |
| President-Agency Divergence | -0.00273 | -0.00273 |  |  |
|  | (0.151) | (0.151) |  |  |
| High Status | 0.366** | 0.366** | 0.374** | 0.363** |
|  | (0.123) | (0.123) | (0.121) | (0.119) |
|  |  |  |  |  |
| lnalpha | -0.297*** | -0.297*** | -0.294*** | -0.287*** |
|  | (0.0628) | (0.0628) | (0.0630) | (0.0640) |
|  |  |  |  |  |
| N | 2306 | 2306 | 2306 | 2306 |

Standard errors in parentheses (adjusted for 31 clusters by agency; President Fixed Effects

* p < 0.05, ** p < 0.01, *** p < 0.001

**Table B3. Robustness Checks Using Static Agency Ideology Estimates**

| **Binomial Portion** | **β** | **β** | **β** | **β** |
| --- | --- | --- | --- | --- |
| Chair-Agency Divergence | -0.181 | -0.181 | -0.161** |  |
|  | (0.124) | (0.124) | (0.0502) |  |
| Chair-Agency Divergence - Squared | -0.271 | -0.271 | -0.267* |  |
|  | (0.240) | (0.240) | (0.116) |  |
| Majority Median-Agency Divergence | 0.571 | 0.571 |  | 0.0762 |
|  | (0.605) | (0.605) |  | (0.390) |
| Majority Median-Agency Divergence - Squared | 0.959 | 0.959 |  | 0.367 |
|  | (1.041) | (1.041) |  | (0.743) |
| President-Agency Divergence | 0.232** | 0.232** |  |  |
|  | (0.0806) | (0.0806) |  |  |
| High Status | -0.811*** | -0.811*** | -0.818*** | -0.816*** |
|  | (0.0921) | (0.0921) | (0.0919) | (0.0912) |
| **Logit Portion** |  |  |  |  |
| Chair-Agency Divergence | -2.950*** | -2.950*** | -2.542*** |  |
|  | (0.450) | (0.450) | (0.301) |  |
| Chair-Agency Divergence - Squared | -2.678*** | -2.678*** | -2.385*** |  |
|  | (0.571) | (0.571) | (0.567) |  |
| Majority Median-Agency Divergence | 2.571+ | 2.571+ |  | -2.539* |
|  | (1.516) | (1.516) |  | (1.128) |
| Majority Median-Agency Divergence - Squared | 3.462+ | 3.462+ |  | -2.592 |
|  | (2.066) | (2.066) |  | (1.722) |
| President-Agency Divergence | 0.118 | 0.118 |  |  |
|  | (0.134) | (0.134) |  |  |
| High Status | 0.203+ | 0.203+ | 0.207+ | 0.206+ |
|  | (0.121) | (0.121) | (0.121) | (0.120) |
|  |  |  |  |  |
| lnalpha | -0.201** | -0.201** | -0.196** | -0.196** |
|  | (0.0655) | (0.0655) | (0.0658) | (0.0656) |
|  |  |  |  |  |
| N | 2761 | 2761 | 2761 | 2761 |

Note: Standard errors in parentheses, clustered on agency (31 clusters). Fixed effects for presidents.
**+***p* < 0.1, * *p* < 0.05, ** *p* < 0.01, *** *p* < 0.001 (two-tailed tests).

**Appendix C. Relevant Senate Committees**

**Table C1. Committee Assignment by PAS Position**

| **PAS ID** | **Position Title** | **Agency** | **Comm. ID** | **Committee Name** |
| --- | --- | --- | --- | --- |
| AGR101 | SECRETARY | Department of Agriculture (AGR) | 202 | Agriculture, Nutrition and Forestry |
| AGR202 | DEPUTY SECRETARY | Department of Agriculture (AGR) | 202 | Agriculture, Nutrition and Forestry |
| AGR303 | Under SEC INT AFFS AND COMMODITY PROGS | Department of Agriculture (AGR) | 202 | Agriculture, Nutrition and Forestry |
| AGR414 | Assistant SECRETARY FOR ADMINISTRATION | Department of Agriculture (AGR) | 202 | Agriculture, Nutrition and Forestry |
| AGR415 | Assistant SECRETARY FOR CONGRESSIONAL RELATIONS | Department of Agriculture (AGR) | 202 | Agriculture, Nutrition and Forestry |
| AGR416 | Assistant SECRETARY FOR ECONOMICS | Department of Agriculture (AGR) | 202 | Agriculture, Nutrition and Forestry |
| AGR419 | CHIEF FINANCIAL OFFICER | Department of Agriculture (AGR) | 202 | Agriculture, Nutrition and Forestry |
| AGR420 | GENERAL COUNSEL | Department of Agriculture (AGR) | 202 | Agriculture, Nutrition and Forestry |
| AGR421 | INSPECTOR GENERAL | Department of Agriculture (AGR) | 202 | Agriculture, Nutrition and Forestry |
| AGR524 | ADMINISTRATOR-FHA | Department of Agriculture (AGR) | 202 | Agriculture, Nutrition and Forestry |
| AGR309 | Under SECRETARY FOR RESEARCH, EDUCATION AND ECONOMICS | Department of Agriculture (AGR) | 202 | Agriculture, Nutrition and Forestry |
| AGR308 | Under SECRETARY FOR MARKETING AND REGULATORY PROGRAMS | Department of Agriculture (AGR) | 202 | Agriculture, Nutrition and Forestry |
| AGR307 | Under SECRETARY FOR FOOD SAFETY | Department of Agriculture (AGR) | 202 | Agriculture, Nutrition and Forestry |
| AGR522 | ADMINISTRATOR FEDERAL GRAIN INSPECTION SERVICE | Department of Agriculture (AGR) | 202 | Agriculture, Nutrition and Forestry |
| AGR306 | Under SECRETARY FOR FOOD NUTRITION AND CONSUMER SERVICES | Department of Agriculture (AGR) | 202 | Agriculture, Nutrition and Forestry |
| AGR304 | Under SECRETARY FOR NATURAL RESOURCES AND ENVIRONMENT | Department of Agriculture (AGR) | 202 | Agriculture, Nutrition and Forestry |
| AGR310 | Under SECRETARY FOR RURAL DEVELOPMENT | Department of Agriculture (AGR) | 202 | Agriculture, Nutrition and Forestry |
| AGR523 | ADMINISTRATOR RURAL ELECTRIFICATION ADMIN | Department of Agriculture (AGR) | 202 | Agriculture, Nutrition and Forestry |
| DOD205 | Under SECRETARY OF DEF FOR ACQ AND TECHNOL | Department of Defense (DOD) | 204 | Armed Services |
| DOD404 | Assistant SECRETARY FOR ACQUISITION | Department of Defense (DOD) | 204 | Armed Services |
| DOD436 | Assistant TO THE SECRETARY OF DEFENSE NUCLEAR CHEMICAL AND BIOLOGICAL | Department of Defense (DOD) | 204 | Armed Services |
| DOD442 | PRINCIPAL DEP Under SECRETARY OF DEFENSE ACQUISITION | Department of Defense (DOD) | 204 | Armed Services |
| DOD202 | SECRETARY OF THE AIR FORCE | Department of Defense (DOD) | 204 | Armed Services |
| DOD406 | Assistant SECRETARY FOR MANPOWER | Department of Defense (DOD) | 204 | Armed Services |
| DOD407 | Assistant SECRETARY FOR SPACE | Department of Defense (DOD) | 204 | Armed Services |
| DOD408 | GENERAL COUNSEL AIR FORCE | Department of Defense (DOD) | 204 | Armed Services |
| DOD409 | Under SECRETARY OF THE AIR FORCE | Department of Defense (DOD) | 204 | Armed Services |
| DOD203 | SECRETARY OF THE ARMY | Department of Defense (DOD) | 204 | Armed Services |
| DOD411 | Assistant SECRETARY ARMY (CIVIL WORKS) | Department of Defense (DOD) | 204 | Armed Services |
| DOD412 | Assistant SECRETARY ARMY (INSTALLATIONS, LOGISTICS AND ENVIRONMENT) | Department of Defense (DOD) | 204 | Armed Services |
| DOD413 | Assistant SECRETARY ARMY (MANPOWER AND RESERVE AFFAIRS) | Department of Defense (DOD) | 204 | Armed Services |
| DOD414 | Assistant SECRETARY ARMY (RESEARCH, DEVELOPMENT AND ACQUISITION) | Department of Defense (DOD) | 204 | Armed Services |
| DOD415 | Assistant SECRETARY OF THE ARMY (FINANCIAL MANAGEMENT AND COMPTROLLER) | Department of Defense (DOD) | 204 | Armed Services |
| DOD416 | GENERAL COUNSEL ARMY | Department of Defense (DOD) | 204 | Armed Services |
| DOD417 | Under SECRETARY OF THE ARMY | Department of Defense (DOD) | 204 | Armed Services |
| DOD405 | Assistant SECRETARY FOR FINANCIAL MANAGEMENT | Department of Defense (DOD) | 204 | Armed Services |
| DOD431 | Assistant SECRETARY OF DEFENSE HEALTH AFFAIRS | Department of Defense (DOD) | 204 | Armed Services |
| DOD444 | Under SECRETARY OF DEFENSE FOR INTELLIGENCE | Department of Defense (DOD) | 204 | Armed Services |
| DOD429 | Assistant SECRETARY OF DEFENSE INTERNATIONAL SECURITY POLICY | Department of Defense (DOD) | 204 | Armed Services |
| DOD423 | Assistant SECRETARY DEFENSE (INTERNATIONAL SECURITY AFFAIRS) | Department of Defense (DOD) | 204 | Armed Services |
| DOD437 | DEPUTY Under SECRETARY OF DEFENSE LOGISTICS AND MATERIEL READINESS | Department of Defense (DOD) | 204 | Armed Services |
| DOD101 | SECRETARY OF DEFENSE | Department of Defense (DOD) | 204 | Armed Services |
| DOD201 | DEPUTY SECRETARY OF DEFENSE | Department of Defense (DOD) | 204 | Armed Services |
| DOD306 | Under SECRETARY OF DEFENSE (COMPTROLLER) | Department of Defense (DOD) | 204 | Armed Services |
| DOD307 | Under SECRETARY OF DEFENSE (PERSONNEL AND READINESS) | Department of Defense (DOD) | 204 | Armed Services |
| DOD308 | Under SECRETARY OF DEFENSE FOR POLICY | Department of Defense (DOD) | 204 | Armed Services |
| DOD424 | Assistant SECRETARY OF DEF (FORCE MGMT AND PERSONNEL) | Department of Defense (DOD) | 204 | Armed Services |
| DOD425 | Assistant SECRETARY OF DEF (PERSONNEL AND READINESS) | Department of Defense (DOD) | 204 | Armed Services |
| DOD426 | Assistant SECRETARY OF DEF (PRODUCTION AND LOGISTICS) | Department of Defense (DOD) | 204 | Armed Services |
| DOD427 | Assistant SECRETARY OF DEFENSE (COMMAND, CONTROL, COMMUNNITY AND INTELLIGENCE) | Department of Defense (DOD) | 204 | Armed Services |
| DOD428 | Assistant SECRETARY OF DEFENSE FORCE MANAGEMENT POLICY | Department of Defense (DOD) | 204 | Armed Services |
| DOD430 | Assistant SECRETARY OF DEFENSE LEGISLATIVE AFFAIRS | Department of Defense (DOD) | 204 | Armed Services |
| DOD432 | Assistant SECRETARY OF DEFENSE RESERVE AFFAIRS | Department of Defense (DOD) | 204 | Armed Services |
| DOD433 | Assistant SECRETARY OF DEFENSE SPECIAL OPERATIONS/LOW INTENSITY CONFLICT | Department of Defense (DOD) | 204 | Armed Services |
| DOD434 | Assistant SECRETARY OF DEFENSE ECONOMIC SECURITY | Department of Defense (DOD) | 204 | Armed Services |
| DOD435 | Assistant SECRETARY OF DEFENSE PUBLIC AFFAIRS | Department of Defense (DOD) | 204 | Armed Services |
| DOD438 | DIRECTOR OF DEFENSE RESEARCH AND ENGINEERING | Department of Defense (DOD) | 204 | Armed Services |
| DOD439 | DIRECTOR, OPERATIONAL TEST AND EVALUATION | Department of Defense (DOD) | 204 | Armed Services |
| DOD440 | GENERAL COUNSEL | Department of Defense (DOD) | 204 | Armed Services |
| DOD441 | INSPECTOR GENERAL | Department of Defense (DOD) | 204 | Armed Services |
| DOD443 | PRINCIPAL DEPUTY Under SECRETARY OF DEFENSE FOR POLICY | Department of Defense (DOD) | 204 | Armed Services |
| DOD445 | DEPUTY UnderSECRETARY OF DEFENSE FOR PERSONAL READINESS | Department of Defense (DOD) | 204 | Armed Services |
| DOD447 | Assistant SECRETARY OF DEFENSE INTERNATIONAL SECURITY AFFAIRS | Department of Defense (DOD) | 204 | Armed Services |
| DOD446 | Assistant SECRETARY OF DEFENSE FOR HOMELAND SECURITY | Department of Defense (DOD) | 204 | Armed Services |
| DOD204 | SECRETARY OF THE NAVY | Department of Defense (DOD) | 204 | Armed Services |
| DOD410 | Under SECRETARY OF THE NAVY | Department of Defense (DOD) | 204 | Armed Services |
| DOD418 | Assistant SECRETARY OF NAVY (INSTALLATIONS AND ENVIRONMENT) | Department of Defense (DOD) | 204 | Armed Services |
| DOD419 | Assistant SECRETARY OF THE NAVY (MANPOWER AND RESEARCH AFFAIRS) | Department of Defense (DOD) | 204 | Armed Services |
| DOD420 | Assistant SECRETARY OF THE NAVY (RESEARCH DEVELOPMENT AND ACQUISTION) | Department of Defense (DOD) | 204 | Armed Services |
| DOD421 | GENERAL COUNSEL NAVY | Department of Defense (DOD) | 204 | Armed Services |
| DOD422 | Under SECRETARY OF THE NAVY | Department of Defense (DOD) | 204 | Armed Services |
| SS401 | DIRECTOR SELECTIVE SERVICE SYSTEM | Selective Service System (SS) | 204 | Armed Services |
| CEA201 | CHAIRMAN COUNCIL OF ECONOMIC ADVISERS | Council of Economic Advisors (CEA) | 205 | Banking, Housing, and Urban Affairs |
| CEA402 | MEMBER (CEA) | Council of Economic Advisors (CEA) | 205 | Banking, Housing, and Urban Affairs |
| COM415 | Assistant SECRETARY FOR EXPORT ADMINISTRATION | Department of Commerce (COM) | 205 | Banking, Housing, and Urban Affairs |
| COM416 | Assistant SECRETARY FOR EXPORT ENFORCEMENT | Department of Commerce (COM) | 205 | Banking, Housing, and Urban Affairs |
| COM304 | Under SECRETARY FOR EXPORT ADMINISTRATION | Department of Commerce (COM) | 205 | Banking, Housing, and Urban Affairs |
| COM417 | Assistant SECRETARY FOR IMPORT ADMINISTRATION | Department of Commerce (COM) | 205 | Banking, Housing, and Urban Affairs |
| COM418 | Assistant SECRETARY FOR INTERNL ECONOMIC POLICY | Department of Commerce (COM) | 205 | Banking, Housing, and Urban Affairs |
| COM305 | Under SECRETARY FOR INTERNATIONAL TRADE | Department of Commerce (COM) | 205 | Banking, Housing, and Urban Affairs |
| COM423 | Assistant SECRETARY FOR TRADE DEVELOPMENT | Department of Commerce (COM) | 205 | Banking, Housing, and Urban Affairs |
| HUD407 | Assistant SECRETARY FOR FAIR HOUSING AND EQUAL OPPORTUN | Department of Housing and Urban Development (HUD) | 205 | Budget |
| HUD408 | Assistant SECRETARY FOR HOUSING, FEDERAL HOUSING COMMISSIONER | Department of Housing and Urban Development (HUD) | 205 | Budget |
| HUD414 | PRESIDENT, GOVERNMENT NATIONAL MORTGAGE ASSOCIATION | Department of Housing and Urban Development (HUD) | 205 | Budget |
| HUD101 | SECRETARY, HOUSING AND URBAN DEVELOPMENT | Department of Housing and Urban Development (HUD) | 205 | Budget |
| HUD202 | DEPUTY SECRETARY, HOUSING AND URBAN DEVELOPMENT | Department of Housing and Urban Development (HUD) | 205 | Budget |
| HUD402 | DIRECTOR OFFICE OF FEDERAL HOUSING ENTERPRISE OVERSIGHT | Department of Housing and Urban Development (HUD) | 205 | Budget |
| HUD403 | Assistant SEC FOR COMMUNITY PLANNING AND DEVELOPMENT | Department of Housing and Urban Development (HUD) | 205 | Budget |
| HUD404 | Assistant SEC FOR POLICY DEV AND RESEARCH | Department of Housing and Urban Development (HUD) | 205 | Budget |
| HUD405 | Assistant SECRETARY FOR ADMINISTRATION | Department of Housing and Urban Development (HUD) | 205 | Budget |
| HUD406 | Assistant SECRETARY FOR CONGRESSIONAL\INTERL RELATIONS | Department of Housing and Urban Development (HUD) | 205 | Budget |
| HUD409 | Assistant SECRETARY FOR PUBLIC AFFAIRS | Department of Housing and Urban Development (HUD) | 205 | Budget |
| HUD410 | CHIEF FINANCIAL OFFICER | Department of Housing and Urban Development (HUD) | 205 | Budget |
| HUD411 | DIRECTOR OFFICE OF MULTIFAMILY HOUSING | Department of Housing and Urban Development (HUD) | 205 | Budget |
| HUD412 | GENERAL COUNSEL | Department of Housing and Urban Development (HUD) | 205 | Budget |
| HUD413 | INSPECTOR GENERAL | Department of Housing and Urban Development (HUD) | 205 | Budget |
| HUD415 | Assistant SECRETARY FOR PUBLIC AND INDIAN HOUSING | Department of Housing and Urban Development (HUD) | 205 | Budget |
| COM101 | SECRETARY | Department of Commerce (COM) | 207 | Commerce, Science, and Transportation |
| COM202 | DEPUTY SECRETARY | Department of Commerce (COM) | 207 | Commerce, Science, and Transportation |
| COM308 | Under-SECRETARY FOR TRAVEL AND TOURISM | Department of Commerce (COM) | 207 | Commerce, Science, and Transportation |
| COM410 | Assistant SECRETARY AND DIRECTOR GENERAL OF UNITED STATES/FOR COMMERCIAL SERVICES | Department of Commerce (COM) | 207 | Commerce, Science, and Transportation |
| COM412 | Assistant SECRETARY FOR ADMINISTRATOR AND CHIEF FINANCIAL OFFICER | Department of Commerce (COM) | 207 | Commerce, Science, and Transportation |
| COM413 | Assistant SECRETARY FOR CONGRESSIONAL AND INTERGOVERNMENTAL AFFAIRS | Department of Commerce (COM) | 207 | Commerce, Science, and Transportation |
| COM425 | Assistant SECRETARY OF COMMERCE (Counselor) | Department of Commerce (COM) | 207 | Commerce, Science, and Transportation |
| COM429 | GENERAL COUNSEL | Department of Commerce (COM) | 207 | Commerce, Science, and Transportation |
| COM430 | INSPECTOR GENERAL | Department of Commerce (COM) | 207 | Commerce, Science, and Transportation |
| COM303 | Under SECRETARY FOR ECONOMIC AFFAIRS | Department of Commerce (COM) | 207 | Commerce, Science, and Transportation |
| COM532 | CHIEF SCIENTIST | Department of Commerce (COM) | 207 | Commerce, Science, and Transportation |
| COM306 | Under SECRETARY FOR TECHNOLOGY | Department of Commerce (COM) | 207 | Commerce, Science, and Transportation |
| COM421 | Assistant SECRETARY FOR TECHNOLOGY POLICY | Department of Commerce (COM) | 207 | Commerce, Science, and Transportation |
| COM428 | DIRECTOR NATIONAL INST OF STD AND TECHNOL | Department of Commerce (COM) | 207 | Commerce, Science, and Transportation |
| COM307 | Under SECRETARY OCEANS AND ATMPSPHERE (ADMR NOAA) | Department of Commerce (COM) | 207 | Commerce, Science, and Transportation |
| COM424 | Assistant SECRETARY OCEANS AND ATMOSPHERIC (DEPUTY ADMINISTRATOR NATIONAL OCEANIC AND ATMOSPHERIC ADMINISTRATION) | Department of Commerce (COM) | 207 | Commerce, Science, and Transportation |
| COM422 | Assistant SECRETARY FOR TELCOMMUNICATIONS AND INFORMATION | Department of Commerce (COM) | 207 | Commerce, Science, and Transportation |
| NAS201 | ADMINISTRATOR NASA | National Aeronautics and Space Administration (NASA) | 207 | Commerce, Science, and Transportation |
| NAS302 | DEPUTY ADMINISTRATOR NASA | National Aeronautics and Space Administration (NASA) | 207 | Commerce, Science, and Transportation |
| NAS403 | CHIEF FINANCIAL OFFICER NASA | National Aeronautics and Space Administration (NASA) | 207 | Commerce, Science, and Transportation |
| NAS404 | INSPECTOR GENERAL NASA | National Aeronautics and Space Administration (NASA) | 207 | Commerce, Science, and Transportation |
| OST201 | DIRECTOR OSTP | Office of Science and Technology (OST) | 207 | Commerce, Science, and Transportation |
| OST302 | ASSOCIATE DIRECTOR | Office of Science and Technology (OST) | 207 | Commerce, Science, and Transportation |
| OST303 | ASSOCIATE DIRECTOR ENVIRONMENT | Office of Science and Technology (OST) | 207 | Commerce, Science, and Transportation |
| OST304 | ASSOCIATE DIRECTOR NS AND INTL AFFAIRS | Office of Science and Technology (OST) | 207 | Commerce, Science, and Transportation |
| OST305 | ASSOCIATE DIRECTOR SCIENCE | Office of Science and Technology (OST) | 207 | Commerce, Science, and Transportation |
| OST306 | ASSOCIATE DIRECTOR TECHNOLOGY | Office of Science and Technology (OST) | 207 | Commerce, Science, and Transportation |
| TRN202 | ADMINISTRATOR FAA | Department of Transportation (TRN) | 207 | Commerce, Science, and Transportation |
| TRN416 | DEPUTY ADMINISTRATOR FAA | Department of Transportation (TRN) | 207 | Commerce, Science, and Transportation |
| TRN203 | ADMINISTRATOR FHWA | Department of Transportation (TRN) | 207 | Commerce, Science, and Transportation |
| TRN419 | ADMINISTRATOR FEDERAL MOTOR CARRIER SAFETY ADMINISTRATION | Department of Transportation (TRN) | 207 | Commerce, Science, and Transportation |
| TRN306 | ADMINISTRATOR FRA | Department of Transportation (TRN) | 207 | Commerce, Science, and Transportation |
| TRN305 | ADMINISTRATOR URBAN MASS TRANSPORTATION ADMINISTRATION | Department of Transportation (TRN) | 207 | Commerce, Science, and Transportation |
| TRN307 | ADMINISTRATOR FTA | Department of Transportation (TRN) | 207 | Commerce, Science, and Transportation |
| TRN420 | ADMINISTRATOR PIPELINE AND HAZARDOUS MATERIALS SAFETY ADMINISTRATION | Department of Transportation (TRN) | 207 | Commerce, Science, and Transportation |
| TRN309 | ADMINISTRATOR MARITIME ADMIN | Department of Transportation (TRN) | 207 | Commerce, Science, and Transportation |
| TRN308 | ADMINISTRATOR NHTSA | Department of Transportation (TRN) | 207 | Commerce, Science, and Transportation |
| TRN310 | ADMINISTRATOR RSPA/RITA | Department of Transportation (TRN) | 207 | Commerce, Science, and Transportation |
| TRN411 | ADMINISTRATOR ST LAWRENCE SEAWAY CORP | Department of Transportation (TRN) | 207 | Commerce, Science, and Transportation |
| TRN101 | SECRETARY | Department of Transportation (TRN) | 207 | Commerce, Science, and Transportation |
| TRN204 | DEPUTY SECRETARY | Department of Transportation (TRN) | 207 | Commerce, Science, and Transportation |
| TRN205 | UnderSECRETARY OF TRANSPORTATION SECURITY | Department of Transportation (TRN) | 207 | Commerce, Science, and Transportation |
| TRN206 | UnderSECRETARY OF TRANSPORTATION FOR POLICY | Department of Transportation (TRN) | 207 | Commerce, Science, and Transportation |
| TRN412 | Assistant SECRETARY FOR AVIATION AND INTERNATIONAL AFFAIRS | Department of Transportation (TRN) | 207 | Commerce, Science, and Transportation |
| TRN413 | Assistant SECRETARY FOR BUDGET AND PROGRAMS AND CHIEF FINANCIAL OFFICER | Department of Transportation (TRN) | 207 | Commerce, Science, and Transportation |
| TRN414 | Assistant SECRETARY FOR GOVERNMENTAL AFFAIRS | Department of Transportation (TRN) | 207 | Commerce, Science, and Transportation |
| TRN415 | Assistant SECRETARY FOR TRANSPORTATION POLICY | Department of Transportation (TRN) | 207 | Commerce, Science, and Transportation |
| TRN417 | GENERAL COUNSEL | Department of Transportation (TRN) | 207 | Commerce, Science, and Transportation |
| TRN418 | INSPECTOR GENERAL | Department of Transportation (TRN) | 207 | Commerce, Science, and Transportation |
| TRN519 | ASSOCIATE DEPUTY SECRETARY | Department of Transportation (TRN) | 207 | Commerce, Science, and Transportation |
| TRN520 | DIRECTOR BUREAU OF TRANSPORTATION STATISTICS | Department of Transportation (TRN) | 207 | Commerce, Science, and Transportation |
| ENG101 | SECRETARY, DEPARTMENT OF ENERGY | Department of Energy (ENG) | 208 | Energy and Natural Resources |
| ENG202 | DEPUTY SECRETARY OF ENERGY | Department of Energy (ENG) | 208 | Energy and Natural Resources |
| ENG303 | Under SECRETARY | Department of Energy (ENG) | 208 | Energy and Natural Resources |
| ENG405 | ADMINISTRATOR-ENERGY INFORMATION ADMINISTRATION | Department of Energy (ENG) | 208 | Energy and Natural Resources |
| ENG406 | Assistant SEC OF ENERGY (INT AFF AND ENERGY EMERG) | Department of Energy (ENG) | 208 | Energy and Natural Resources |
| ENG407 | Assistant SEC OF ENERGY (MGMT AND ADMIN) | Department of Energy (ENG) | 208 | Energy and Natural Resources |
| ENG410 | Assistant SECRETARY FOR CONGRESSIONAL AND INTERGOVERNMENTAL AFFAIRS | Department of Energy (ENG) | 208 | Energy and Natural Resources |
| ENG413 | Assistant SECRETARY FOR HUMAN RESOURCES AND ADMINSTRA | Department of Energy (ENG) | 208 | Energy and Natural Resources |
| ENG415 | Assistant SECRETARY OF ENERGY (DEF PROG) | Department of Energy (ENG) | 208 | Energy and Natural Resources |
| ENG417 | CHIEF FINANCIAL OFFICER | Department of Energy (ENG) | 208 | Energy and Natural Resources |
| ENG418 | DEPUTY ADMINISTRATOR FOR DEFENSE PROGRAMS | Department of Energy (ENG) | 208 | Energy and Natural Resources |
| ENG420 | DIRECTOR, OFFICE OF ENERGY RESEARCH | Department of Energy (ENG) | 208 | Energy and Natural Resources |
| ENG421 | DIRECTOR, OFFICE OF CIVILIAN RADIOACTIVE WASTE MANAGEMENT | Department of Energy (ENG) | 208 | Energy and Natural Resources |
| ENG422 | GENERAL COUNSEL | Department of Energy (ENG) | 208 | Energy and Natural Resources |
| ENG423 | INSPECTOR GENERAL | Department of Energy (ENG) | 208 | Energy and Natural Resources |
| ENG419 | DIRECTOR OFFICE OF ECONOMIC IMPACT AND DIVERSITY | Department of Energy (ENG) | 208 | Energy and Natural Resources |
| ENG416 | Assistant SECRETARY OF ENERGY (ENVIRONMENTAL MANAGEMENT) | Department of Energy (ENG) | 208 | Energy and Natural Resources |
| ENG414 | Assistant SECRETARY FOR POLICY PLANNING AND PROGRAM EVALU | Department of Energy (ENG) | 208 | Energy and Natural Resources |
| ENG409 | Assistant SECRETARY (CONSERVATION AND RENEWABLE ENERGY) | Department of Energy (ENG) | 208 | Energy and Natural Resources |
| ENG411 | Assistant SECRETARY FOR ENVIRONMENT, SAFETY AND HEALTH | Department of Energy (ENG) | 208 | Energy and Natural Resources |
| ENG412 | Assistant SECRETARY FOR FOSSIL ENERGY | Department of Energy (ENG) | 208 | Energy and Natural Resources |
| ENG304 | Under SECRETARY FOR NUCLEAR SECURITY | Department of Energy (ENG) | 208 | Energy and Natural Resources |
| INT516 | DIRECTOR BUREAU OF LAND MANAGEMENT | Department of the Interior (INT) | 208 | Energy and Natural Resources |
| INT101 | SECRETARY | Department of the Interior (INT) | 208 | Energy and Natural Resources |
| INT202 | DEPUTY SECRETARY OF THE INTERIOR | Department of the Interior (INT) | 208 | Energy and Natural Resources |
| INT403 | INSPECTOR GENERAL | Department of the Interior (INT) | 208 | Energy and Natural Resources |
| INT405 | Assistant SECRETARY FOR FISH AND WILDLIFE AND PARKS | Department of the Interior (INT) | 208 | Energy and Natural Resources |
| INT406 | Assistant SECRETARY POLICY MANAGEMENT AND BUDGET /Assistant SECRETARY FOR POLICY BUDGET AND ADMINISTRATION | Department of the Interior (INT) | 208 | Energy and Natural Resources |
| INT407 | Assistant SECRETARY FOR WATER AND SCIENCE | Department of the Interior (INT) | 208 | Energy and Natural Resources |
| INT410 | Assistant SECRETARY-LAND AND MINERALS MANAGEMENT | Department of the Interior (INT) | 208 | Energy and Natural Resources |
| INT411 | Assistant SECRETARY-TERRITORIAL AND INTERNL AFFAIRS | Department of the Interior (INT) | 208 | Energy and Natural Resources |
| INT414 | SOLICITOR | Department of the Interior (INT) | 208 | Energy and Natural Resources |
| INT517 | DIRECTOR BUREAU OF MINES | Department of the Interior (INT) | 208 | Energy and Natural Resources |
| INT404 | DIRECTOR NATIONAL PARK SERVICE | Department of the Interior (INT) | 208 | Energy and Natural Resources |
| INT515 | COMMISSIONER BUREAU OF RECLAMATION | Department of the Interior (INT) | 208 | Energy and Natural Resources |
| INT413 | DIRECTOR OFFICE OF SURFACE MINING RECLAMATION AND ENFORCEMENT | Department of the Interior (INT) | 208 | Energy and Natural Resources |
| INT518 | DIRECTOR GEOLOGICAL SURVEY | Department of the Interior (INT) | 208 | Energy and Natural Resources |
| CEQ201 | CHAIRMAN (CEQ) | Council on Environmental Quality (CEQ) | 209 | Environment and Public Works |
| COM414 | Assistant SECRETARY FOR Economic Development | Department of Commerce (COM) | 209 | Environment and Public Works |
| EPA201 | ADMINISTRATOR EPA | Environmental Protection Agency (EPA) | 209 | Environment and Public Works |
| EPA302 | DEPUTY ADMINISTRATOR EPA | Environmental Protection Agency (EPA) | 209 | Environment and Public Works |
| EPA403 | Assistant ADMINISTRATOR FOR SOLID WASTE AND EMERGENCY RESP | Environmental Protection Agency (EPA) | 209 | Environment and Public Works |
| EPA404 | Assistant ADMINISTRATOR FOR ADMININSTRATION AND RESOURCES MANAGEMENT | Environmental Protection Agency (EPA) | 209 | Environment and Public Works |
| EPA405 | Assistant ADMINISTRATOR FOR AIR AND RADIATION | Environmental Protection Agency (EPA) | 209 | Environment and Public Works |
| EPA406 | Assistant ADMINISTRATOR FOR ENFORCEMT AND COMPLIANCE ASSURANCE | Environmental Protection Agency (EPA) | 209 | Environment and Public Works |
| EPA407 | Assistant ADMINISTRATOR FOR ENVIRONMENTAL INFORMATION | Environmental Protection Agency (EPA) | 209 | Environment and Public Works |
| EPA408 | Assistant ADMINISTRATOR FOR INTERNATIONAL ACTIVITIES | Environmental Protection Agency (EPA) | 209 | Environment and Public Works |
| EPA409 | Assistant ADMINISTRATOR FOR POL PLAN AND EVALUATION | Environmental Protection Agency (EPA) | 209 | Environment and Public Works |
| EPA410 | Assistant ADMINISTRATOR FOR PREVENTION PESTICIDES AND TOXICS SUBSTANCES | Environmental Protection Agency (EPA) | 209 | Environment and Public Works |
| EPA411 | Assistant ADMINISTRATOR FOR RESEARCH AND DEVELOPMENT | Environmental Protection Agency (EPA) | 209 | Environment and Public Works |
| EPA412 | Assistant ADMINISTRATOR FOR WATER | Environmental Protection Agency (EPA) | 209 | Environment and Public Works |
| EPA413 | GENERAL COUNSEL EPA | Environmental Protection Agency (EPA) | 209 | Environment and Public Works |
| EPA414 | CHIEF FINANCIAL OFFICER EPA | Environmental Protection Agency (EPA) | 209 | Environment and Public Works |
| EPA415 | INSPECTOR GENERAL EPA | Environmental Protection Agency (EPA) | 209 | Environment and Public Works |
| INT519 | DIRECTOR UNITED STATES FISH AND WILDLIFE SERVICE | Department of the Interior (INT) | 209 | Environment and Public Works |
| TRS307 | COMPTROLLER OF THE CURRENCY | Department of the Treasury (TRS) | 211 | Finance |
| TRS308 | COMMISSIONER OF CUSTOMS | Department of the Treasury (TRS) | 211 | Finance |
| TRS304 | Under SECRETARY FOR DOMESTIC FINANCE | Department of the Treasury (TRS) | 211 | Finance |
| TRS427 | Assistant SECRETARY FOR TERRORIST FINANCING | Department of the Treasury (TRS) | 211 | Finance |
| TRS305 | COMMISSIONER OF INTERNAL REVENUE | Department of the Treasury (TRS) | 211 | Finance |
| TRS527 | CHIEF COUNSEL INTERNAL REVENUE SERVICES | Department of the Treasury (TRS) | 211 | Finance |
| TRS421 | DIRECTOR OF THE MINT | Department of the Treasury (TRS) | 211 | Finance |
| TRS306 | DIRECTOR OFFICE OF THRIFT SUPERVISION | Department of the Treasury (TRS) | 211 | Finance |
| TRS101 | SECRETARY | Department of the Treasury (TRS) | 211 | Finance |
| TRS202 | DEPUTY SECRETARY OF THE TREASURY | Department of the Treasury (TRS) | 211 | Finance |
| TRS303 | Under SECRETARY FOR INTERNATIONAL AFFAIRS | Department of the Treasury (TRS) | 211 | Finance |
| TRS309 | Under SECRETARY FOR ENFORCEMENT | Department of the Treasury (TRS) | 211 | Finance |
| TRS410 | GENERAL COUNSEL | Department of the Treasury (TRS) | 211 | Finance |
| TRS411 | Assistant SECRETARY (FINANCIAL INSTITUTIONS) | Department of the Treasury (TRS) | 211 | Finance |
| TRS412 | Assistant SECRETARY/DEPUTY Under SECRETARY INTERNATIONAL AFFAIRS | Department of the Treasury (TRS) | 211 | Finance |
| TRS413 | Assistant SECRETARY FOR POLICY DEVELOPMENT | Department of the Treasury (TRS) | 211 | Finance |
| TRS414 | Assistant SECRETARY (PUBLIC AFFAIRS AND PUBLIC LIAISON) | Department of the Treasury (TRS) | 211 | Finance |
| TRS416 | Assistant SECRETARY/DEPUTY Under SECRETARY LEGISLATIVE AFFAIRS | Department of the Treasury (TRS) | 211 | Finance |
| TRS417 | Assistant SECRETARY (MANAGEMENT) AND CHIEF FINANCIAL OFFICER | Department of the Treasury (TRS) | 211 | Finance |
| TRS418 | Assistant SECRETARY ECONOMIC POLICY | Department of the Treasury (TRS) | 211 | Finance |
| TRS419 | TREASURER OF THE UNITED STATES | Department of the Treasury (TRS) | 211 | Finance |
| TRS420 | INSPECTOR GENERAL | Department of the Treasury (TRS) | 211 | Finance |
| TRS422 | Assistant SECRETARY - ENFORCEMENT | Department of the Treasury (TRS) | 211 | Finance |
| TRS424 | Assistant SECRETARY FOR FINANCIAL MARKETS | Department of the Treasury (TRS) | 211 | Finance |
| TRS425 | INSPECTOR GENERAL FOR TAX ADMINISTRATION | Department of the Treasury (TRS) | 211 | Finance |
| TRS426 | Assistant SECRETARY | Department of the Treasury (TRS) | 211 | Finance |
| TRS428 | Assistant SECRETARY FOR INTERNATIONAL ECONOMICS AND DEVELOPMENT | Department of the Treasury (TRS) | 211 | Finance |
| TRS415 | Assistant SECRETARY TAX POLICY | Department of the Treasury (TRS) | 211 | Finance |
| UST101 | UNITED STATES TRADE REPRESENTATIVE | US Trade Representative (UST) | 211 | Finance |
| UST303 | CHIEF AGRICULTURE NEGOTIATOR | US Trade Representative (UST) | 211 | Finance |
| UST304 | DEPUTY UNITED STATES TRADE REPRESENTATIVE | US Trade Representative (UST) | 211 | Finance |
| UST305 | DEPUTY UNITED STATES TRADE REPRESENTATIVE | US Trade Representative (UST) | 211 | Finance |
| UST306 | DEPUTY UNITED STATES TRADE REPRESENTATIVE | US Trade Representative (UST) | 211 | Finance |
| AID201 | ADMINISTRATOR AGENCY FOR INTERNATIONAL DEVELOPMENT | Agency for International Development (AID) | 212 | Foreign Relations |
| AID302 | DEPUTY ADMINISTRATOR | Agency for International Development (AID) | 212 | Foreign Relations |
| AID404 | Assistant ADMINISTRATOR FOR ASIA AND THE NEAR EAST | Agency for International Development (AID) | 212 | Foreign Relations |
| AID405 | Assistant ADMINISTRATOR FOR GLOBAL PROGRAMS/GLOBAL HEALTH | Agency for International Development (AID) | 212 | Foreign Relations |
| AID406 | Assistant ADMINISTRATOR BUREAU FOR MANAGEMENT | Agency for International Development (AID) | 212 | Foreign Relations |
| AID407 | Assistant ADMINISTRATOR NEAR EAST | Agency for International Development (AID) | 212 | Foreign Relations |
| AID408 | Assistant ADMINISTRATOR FOR HUMANITARIAN RESPONSE | Agency for International Development (AID) | 212 | Foreign Relations |
| AID409 | Assistant ADMINISTRATOR FOR EUROPE AND EURASIA | Agency for International Development (AID) | 212 | Foreign Relations |
| AID411 | Assistant ADMINISTRATOR FOR LEGISLATIVE AND PUBLIC AFFAIRS | Agency for International Development (AID) | 212 | Foreign Relations |
| AID412 | Assistant ADMINISTRATOR PROGRAM AND POLICY COORDINATION | Agency for International Development (AID) | 212 | Foreign Relations |
| AID413 | Assistant ADMINISTRATOR SCIENCE AND TECHNOLOGY | Agency for International Development (AID) | 212 | Foreign Relations |
| AID414 | Assistant ADMINISTRATOR FOR PRIVATE ENTERPRISE | Agency for International Development (AID) | 212 | Foreign Relations |
| AID415 | Assistant ADMINISTRATOR AFRICA | Agency for International Development (AID) | 212 | Foreign Relations |
| AID416 | Assistant ADMINISTRATOR FOR LATIN AMERICA AND THE CARRIBEAN | Agency for International Development (AID) | 212 | Foreign Relations |
| AID417 | INSPECTOR GENERAL | Agency for International Development (AID) | 212 | Foreign Relations |
| ARM201 | DIRECTOR U S ARMS CONTROL AND DISARMAMENT AGENCY | Department of the Army (ARM) | 212 | Foreign Relations |
| ARM405 | DEPUTY DIRECTOR U S ARMS CONTROL AND DISARMAMENT AGENCY | Department of the Army (ARM) | 212 | Foreign Relations |
| ARM406 | SPEC REPRESENTATIVE AND CHIEF SCIENCE ADVISOR U S ARMS CONTROL AND DISARMAMENT AGENCY | Department of the Army (ARM) | 212 | Foreign Relations |
| ARM407 | SPECIAL REPRESENTATIVE (NPT) U S ARMS CONTROL AND DISARMAMENT AGENCY | Department of the Army (ARM) | 212 | Foreign Relations |
| ARM501 | Assistant DIR INTELLIGENCE V AND I SUPPORT BUREAU U S ARMS CONTROL AND DISARMAMENT AGENCY | Department of the Army (ARM) | 212 | Foreign Relations |
| ARM502 | Assistant DIRECTOR NONPROLIFERATION REG ACB U S ARMS CONTROL AND DISARMAMENT AGENCY | Department of the Army (ARM) | 212 | Foreign Relations |
| ARM503 | Assistant DIR STRATEGIC AND EURASINA AFFS BUREAU U S ARMS CONTROL AND DISARMAMENT AGENCY | Department of the Army (ARM) | 212 | Foreign Relations |
| ARM504 | Assistant DIRECTOR MULTILUTERAL AFFAIRS BUREAU U S ARMS CONTROL AND DISARMAMENT AGENCY | Department of the Army (ARM) | 212 | Foreign Relations |
| DOS418 | Assistant SECRETARY FOR AFRICAN AFFAIRS | State Department (DOS) | 212 | Foreign Relations |
| DOS303 | Under SECRETARY FOR ARMS CONTROL AND INTERNATIONAL SECURITY AFFAIRS | State Department (DOS) | 212 | Foreign Relations |
| DOS414 | Assistant SECRETARY ARMS CONTROL | State Department (DOS) | 212 | Foreign Relations |
| DOS420 | Assistant SECRETARY FOR CONSULAR AFFAIRS | State Department (DOS) | 212 | Foreign Relations |
| DOS101 | SECRETARY OF STATE | State Department (DOS) | 212 | Foreign Relations |
| DOS202 | DEPUTY SECRETARY | State Department (DOS) | 212 | Foreign Relations |
| DOS304 | Under SECRETARY FOR ECON BUSINESS AND AGRIC AFFAIRS | State Department (DOS) | 212 | Foreign Relations |
| DOS305 | Under SECRETARY FOR GLOBAL AFFAIRS | State Department (DOS) | 212 | Foreign Relations |
| DOS307 | Under SECRETARY FOR MANAGEMENT | State Department (DOS) | 212 | Foreign Relations |
| DOS308 | Under SECRETARY FOR POLITICAL AFFAIRS | State Department (DOS) | 212 | Foreign Relations |
| DOS411 | Assistant SEC FOR NEAR EASTERN AND SOUTH ASIAN AFFAI | State Department (DOS) | 212 | Foreign Relations |
| DOS412 | Assistant SECRETARY OCEANS, INTERNATIONAL ENVIRONMENT AND SCIENCE AFFAIRS | State Department (DOS) | 212 | Foreign Relations |
| DOS413 | Assistant SECRETARY FOR NONPROLIFERATION AND NATIONAL SECURITY | State Department (DOS) | 212 | Foreign Relations |
| DOS415 | Assistant SECRETARY FOR INTELLIGENCE AND RESEARCH | State Department (DOS) | 212 | Foreign Relations |
| DOS417 | Assistant SECRETARY FOR ADMINISTRATION | State Department (DOS) | 212 | Foreign Relations |
| DOS419 | Assistant SECRETARY FOR DEMOCRACY HUMAN RIGHTS AND LABOR | State Department (DOS) | 212 | Foreign Relations |
| DOS422 | Assistant SECRETARY FOR DIPLOMATIC SECURITY | State Department (DOS) | 212 | Foreign Relations |
| DOS423 | Assistant SECRETARY FOR EAST ASIAN AND PACIFIC AFFAIRS | State Department (DOS) | 212 | Foreign Relations |
| DOS424 | Assistant SECRETARY FOR ECONOMIC AND BUSINESS AFFAIRS | State Department (DOS) | 212 | Foreign Relations |
| DOS426 | Assistant SECRETARY FOR INTERNATIONAL ORGANIZATIONAL AFFAIRS | State Department (DOS) | 212 | Foreign Relations |
| DOS427 | Assistant SECRETARY FOR LEGISLATIVE AND INTERGOVERNMENTAL AFFAIRS | State Department (DOS) | 212 | Foreign Relations |
| DOS428 | Assistant SECRETARY FOR POPULATION, REFUGEES AND MIGRATION | State Department (DOS) | 212 | Foreign Relations |
| DOS429 | Assistant SECRETARY FOR PUBLIC AFFAIRS | State Department (DOS) | 212 | Foreign Relations |
| DOS430 | Assistant SECRETARY FOR SOUTH ASIAN AFFAIRS | State Department (DOS) | 212 | Foreign Relations |
| DOS431 | Assistant SECRETARY INTERNATIONAL NARCOTICS MATTERS | State Department (DOS) | 212 | Foreign Relations |
| DOS433 | CHIEF FINANCIAL OFFICER Assistant SECRETARY FOR RESOURCE MANAGEMENT | State Department (DOS) | 212 | Foreign Relations |
| DOS434 | COORDINATOR FOR COUNTER-TERRORISM | State Department (DOS) | 212 | Foreign Relations |
| DOS435 | GENERAL COUNSEL | State Department (DOS) | 212 | Foreign Relations |
| DOS436 | DIRECTOR OFFICE OF FOREIGN MISSIONS | State Department (DOS) | 212 | Foreign Relations |
| DOS437 | INSPECTOR GENERAL | State Department (DOS) | 212 | Foreign Relations |
| DOS438 | LEGAL ADVISER | State Department (DOS) | 212 | Foreign Relations |
| DOS440 | COORDINATOR FOR INT COMMS AND INFO POLICY | State Department (DOS) | 212 | Foreign Relations |
| DOS309 | UnderSECRETARY FOR PUBLIC DIPLOMACY AND PUBLIC AFFAIRS | State Department (DOS) | 212 | Foreign Relations |
| DOS432 | Assistant SECRETARY-EDUCATIONAL AND CULTURAL AFFAIRS | State Department (DOS) | 212 | Foreign Relations |
| DOS425 | Assistant SECRETARY FOR EUROPEAN AND CANADIAN AFFAIRS | State Department (DOS) | 212 | Foreign Relations |
| DOS410 | Assistant SEC FOR INTER-AMERICAN AFFAIRS | State Department (DOS) | 212 | Foreign Relations |
| DOS416 | Assistant SECRETARY BUREAU OF POLITICO-MILITARY AFFAIRS | State Department (DOS) | 212 | Foreign Relations |
| PC301 | DIRECTOR OF PEACE CORPS | Peace Corps (PC) | 212 | Foreign Relations |
| PC402 | DEPUTY DIRECTOR PEACE CORPS | Peace Corps (PC) | 212 | Foreign Relations |
| TDA301 | DIRECTOR TRADE AND DEVELOPMENT | Office of Trade and Development (TD) | 212 | Foreign Relations |
| UIA201 | DIRECTOR UNITED STATES INFORMATION AGENCY | US Information Agency (UIA) | 212 | Foreign Relations |
| UIA301 | DEPUTY DIRECTOR | US Information Agency (UIA) | 212 | Foreign Relations |
| UIA401 | ASSOCIATE DIRECTOR CUTURAL AND EDUC AFFAIRS | US Information Agency (UIA) | 212 | Foreign Relations |
| UIA402 | ASSOCIATE DIRECTOR FOR BROADCASTING | US Information Agency (UIA) | 212 | Foreign Relations |
| UIA403 | ASSOCIATE DIRECTOR FOR EDUC AND CULTURAL AFFAIRS | US Information Agency (UIA) | 212 | Foreign Relations |
| UIA404 | ASSOCIATE DIRECTOR FOR MANAGEMENT | US Information Agency (UIA) | 212 | Foreign Relations |
| UIA405 | ASSOCIATE DIRECTOR FOR PROGRAMS | US Information Agency (UIA) | 212 | Foreign Relations |
| UIA503 | INSPECTOR GENERAL | US Information Agency (UIA) | 212 | Foreign Relations |
| USI301 | PRESIDENT OVERSEAS PRIVATE INVESTMENT CORPORATION | Oversease Private Investment Corporation (USI) | 212 | Foreign Relations |
| USI402 | EXECUTIVE VICE PRESIDENT | Oversease Private Investment Corporation (USI) | 212 | Foreign Relations |
| COM427 | BUREAU OF THE CENSUS | Department of Commerce (COM) | 213 | Homeland Security and Governmental Affairs |
| DHS303 | Under Secretary for Border and Transportation Security | Department of Homeland Security (DHS) | 213 | Homeland Security and Governmental Affairs |
| DHS408 | Commandant of the Coast Guard | Department of Homeland Security (DHS) | 213 | Homeland Security and Governmental Affairs |
| DHS306 | Director, Bureau of Citizenship and Immigration Services | Department of Homeland Security (DHS) | 213 | Homeland Security and Governmental Affairs |
| DHS308 | Commissioner of Customs | Department of Homeland Security (DHS) | 213 | Homeland Security and Governmental Affairs |
| DHS309 | Commissioner of U.S. Customs and Border Protection | Department of Homeland Security (DHS) | 213 | Homeland Security and Governmental Affairs |
| DHS101 | Secretary | Department of Homeland Security (DHS) | 213 | Homeland Security and Governmental Affairs |
| DHS201 | Deputy Secretary | Department of Homeland Security (DHS) | 213 | Homeland Security and Governmental Affairs |
| DHS301 | Under Secretary for Information Analysis and Infrastructure Protection | Department of Homeland Security (DHS) | 213 | Homeland Security and Governmental Affairs |
| DHS302 | Under Secretary for Science and Technology | Department of Homeland Security (DHS) | 213 | Homeland Security and Governmental Affairs |
| DHS305 | Under Secretary for Management | Department of Homeland Security (DHS) | 213 | Homeland Security and Governmental Affairs |
| DHS310 | Under Secretary for Preparedness | Department of Homeland Security (DHS) | 213 | Homeland Security and Governmental Affairs |
| DHS405 | Chief Financial Officer | Department of Homeland Security (DHS) | 213 | Homeland Security and Governmental Affairs |
| DHS406 | General Counsel | Department of Homeland Security (DHS) | 213 | Homeland Security and Governmental Affairs |
| DHS407 | INSPECTOR GENERAL | Department of Homeland Security (DHS) | 213 | Homeland Security and Governmental Affairs |
| DHS409 | Director, Office for State and Local Government Coordination and Preparedness | Department of Homeland Security (DHS) | 213 | Homeland Security and Governmental Affairs |
| DHS412 | Director, Office of Counternarcotics Enforcement | Department of Homeland Security (DHS) | 213 | Homeland Security and Governmental Affairs |
| DHS413 | Assistant Secretary for Science and Technology | Department of Homeland Security (DHS) | 213 | Homeland Security and Governmental Affairs |
| DHS414 | Assistant Secretary for Policy | Department of Homeland Security (DHS) | 213 | Homeland Security and Governmental Affairs |
| DHS415 | Assistant Secretary for Health Affairs and Chief Medical Officer | Department of Homeland Security (DHS) | 213 | Homeland Security and Governmental Affairs |
| DHS304 | Under Secretary for Emergency Preparedness and Response | Department of Homeland Security (DHS) | 213 | Homeland Security and Governmental Affairs |
| DHS311 | Under Secretary for Federal Emergency Management | Department of Homeland Security (DHS) | 213 | Homeland Security and Governmental Affairs |
| DHS312 | Under Secretary for National Protection and Programs | Department of Homeland Security (DHS) | 213 | Homeland Security and Governmental Affairs |
| DHS411 | Administrator of the United States Fire Administration | Department of Homeland Security (DHS) | 213 | Homeland Security and Governmental Affairs |
| DHS416 | Deputy Administrator and COO FEMA | Department of Homeland Security (DHS) | 213 | Homeland Security and Governmental Affairs |
| DHS417 | Deputy Administrator for National Preparedness FEMA | Department of Homeland Security (DHS) | 213 | Homeland Security and Governmental Affairs |
| DHS307 | Director of U.S. Citizenship and Immigration Services | Department of Homeland Security (DHS) | 213 | Homeland Security and Governmental Affairs |
| DHS401 | Assistant Secretary for the Bureau of Immigration and Customs Enforcement | Department of Homeland Security (DHS) | 213 | Homeland Security and Governmental Affairs |
| DHS402 | Assistant Secretary for the Bureau of Immigration and Customs Enforcement | Department of Homeland Security (DHS) | 213 | Homeland Security and Governmental Affairs |
| DHS202 | Assistant Secretary for Transportation Security Administration | Department of Homeland Security (DHS) | 213 | Homeland Security and Governmental Affairs |
| FEM201 | DIRECTOR FEDERAL EMERGENCY MANAGEMENT AGENCY | Federal Emergency Management Agency (FEMA) | 213 | Governmental Affairs |
| FEM401 | ADMINISTRATOR US FIRE ADMINISTRATION | Federal Emergency Management Agency (FEMA) | 213 | Governmental Affairs |
| FEM402 | ADMINISTRATOR FEDERAL INSURANCE | Federal Emergency Management Agency (FEMA) | 213 | Governmental Affairs |
| FEM403 | ASSOCIATE DIRECTOR EXTERNAL AFFAIRS DIRECTORATE | Federal Emergency Management Agency (FEMA) | 213 | Governmental Affairs |
| FEM404 | ASSOCIATE DIR PREPAREDNESS TRAIN EXERCISE DIR | Federal Emergency Management Agency (FEMA) | 213 | Governmental Affairs |
| FEM405 | ASSOCIATE DIRECTOR | Federal Emergency Management Agency (FEMA) | 213 | Governmental Affairs |
| FEM406 | DEPUTY DIRECTOR FEDERAL EMERGENCY MANAGEMENT AGENCY | Federal Emergency Management Agency (FEMA) | 213 | Governmental Affairs |
| FEM407 | INSPECTOR GENERAL | Federal Emergency Management Agency (FEMA) | 213 | Governmental Affairs |
| GSA301 | ADMINISTRATOR GSA | General Services Administration (GSA) | 213 | Governmental Affairs |
| GSA402 | INSPECTOR GENERAL | General Services Administration (GSA) | 213 | Governmental Affairs |
| NAR301 | ARCHIVIST OF THE UNITED STATES | National Archives (NAR) | 213 | Homeland Security and Governmental Affairs |
| OMB404 | ADMINISTRATOR OFFICE OF FEDERAL PROCUREMENT POLICY | Office of Management and Budget (OMB) | 213 | Homeland Security and Governmental Affairs |
| OGE301 | DIRECTOR OFFICE OF GOVERNMENT ETHICS | Office of Government Ethics (OGE) | 213 | Homeland Security and Governmental Affairs |
| OMB101 | DIRECTOR OFFICE OF MANAGEMENT AND BUDGET | Office of Management and Budget (OMB) | 213 | Homeland Security and Governmental Affairs |
| OMB202 | DEPUTY DIRECTOR OFFICE OF MANAGEMENT AND BUDGET | Office of Management and Budget (OMB) | 213 | Homeland Security and Governmental Affairs |
| OMB203 | DEPUTY DIRECTOR FOR MANAGEMENT | Office of Management and Budget (OMB) | 213 | Homeland Security and Governmental Affairs |
| OMB303 | CONTROLLER OFC OF FED FIN MGMT | Office of Management and Budget (OMB) | 213 | Homeland Security and Governmental Affairs |
| OMB405 | ADMINISTRATOR OFFICE OF INFOMATION AND REGULATORY AFFAIRS | Office of Management and Budget (OMB) | 213 | Homeland Security and Governmental Affairs |
| OPM201 | DIRECTOR - OFFICE OF PERSONNEL MANAGEMENT | Office of Personnel Management (OPM) | 213 | Homeland Security and Governmental Affairs |
| OPM302 | DEPUTY DIRECTOR | Office of Personnel Management (OPM) | 213 | Homeland Security and Governmental Affairs |
| OPM403 | INSPECTOR GENERAL | Office of Personnel Management (OPM) | 213 | Homeland Security and Governmental Affairs |
| COM409 | Assistant SECRETARY AND COMMISSIONER OF PATENTS AND TRADEMARKS | Department of Commerce (COM) | 216 | Judiciary |
| COM426 | DEPUTY COMMISSIONER PATENTS AND TRADEMARKS AND DAS | Department of Commerce (COM) | 216 | Judiciary |
| COM531 | Assistant COMMISSIONER FOR PATENTS | Department of Commerce (COM) | 216 | Judiciary |
| JUS282 | Director, Bureau of Alcohol Tobacco and Firearms | Deparment of Justice (JUS) | 216 | Judiciary |
| JUS411 | Assistant ATTORNEY GENERAL CIVIL DIVISION | Deparment of Justice (JUS) | 216 | Judiciary |
| JUS410 | Assistant ATTORNEY GENERAL FOR CIVIL RIGHTS | Deparment of Justice (JUS) | 216 | Judiciary |
| JUS412 | Assistant ATTORNEY GENERAL CRIMINAL DIVISION | Deparment of Justice (JUS) | 216 | Judiciary |
| JUS303 | ADMINISTRATOR, DRUG ENFORCEMENT ADMINISTRATION | Deparment of Justice (JUS) | 216 | Judiciary |
| JUS417 | DEPUTY ADMINISTRATOR, DRUG ENFORCEMENT ADMINISTRATION | Deparment of Justice (JUS) | 216 | Judiciary |
| JUS203 | Director, FEDERAL BUREAU OF INVESTIGATIONS | Deparment of Justice (JUS) | 216 | Judiciary |
| JUS416 | COMMISSIONER IMMIGRATION AND NATURALIZATION SERVICE | Deparment of Justice (JUS) | 216 | Judiciary |
| JUS414 | Assistant ATTORNEY GENERAL FOR JUSTICE PROGRAMS | Deparment of Justice (JUS) | 216 | Judiciary |
| JUS101 | ATTORNEY GENERAL | Deparment of Justice (JUS) | 216 | Judiciary |
| JUS202 | DEPUTY ATTORNEY GENERAL | Deparment of Justice (JUS) | 216 | Judiciary |
| JUS304 | ASSOCIATE ATTORNEY GENERAL | Deparment of Justice (JUS) | 216 | Judiciary |
| JUS305 | SOLICITOR GENERAL | Deparment of Justice (JUS) | 216 | Judiciary |
| JUS406 | ADMINISTRATOR JUVENILE JUSTICE DELINQUENCY PREVENTION | Deparment of Justice (JUS) | 216 | Judiciary |
| JUS407 | Assistant ATTORNEY GENERAL ANTITRUST | Deparment of Justice (JUS) | 216 | Judiciary |
| JUS408 | Assistant ATTORNEY GENERAL LEGAL COUNSEL | Deparment of Justice (JUS) | 216 | Judiciary |
| JUS409 | Assistant ATTORNEY GENERAL LEGISLATIVE AFFAIRS | Deparment of Justice (JUS) | 216 | Judiciary |
| JUS413 | Assistant ATTORNEY GENERAL ENVIRONMENT AND NATURAL RESOURCES | Deparment of Justice (JUS) | 216 | Judiciary |
| JUS415 | Assistant ATTORNEY GENERAL TAX DIVISION | Deparment of Justice (JUS) | 216 | Judiciary |
| JUS418 | DIRECTOR OF THE BUREAU OF JUSTICE ASSISTANCE | Deparment of Justice (JUS) | 216 | Judiciary |
| JUS419 | DIRECTOR OFFICE FOR VICTIMS OF CRIME | Deparment of Justice (JUS) | 216 | Judiciary |
| JUS421 | DIRECTOR, BUREAU OF JUSTICE STATISTICS | Deparment of Justice (JUS) | 216 | Judiciary |
| JUS422 | DIRECTOR, COMMUNITY RELATIONS SERVICE | Deparment of Justice (JUS) | 216 | Judiciary |
| JUS423 | DIRECTOR, NATIONAL INSTITUTE OF JUSTICE | Deparment of Justice (JUS) | 216 | Judiciary |
| JUS424 | INSPECTOR GENERAL | Deparment of Justice (JUS) | 216 | Judiciary |
| JUS425 | SPECIAL COUNSEL OFFICE OF IMMIG RELATED UNFAIR EMPLOYMENT SVCS | Deparment of Justice (JUS) | 216 | Judiciary |
| JUS426 | SPECIAL COUNSEL, FINANCIAL INSTITUTION FRAUD UNIT | Deparment of Justice (JUS) | 216 | Judiciary |
| JUS427 | Assistant ATTORNEY GENERAL (LEGAL POLICY) | Deparment of Justice (JUS) | 216 | Judiciary |
| JUS420 | DIRECTOR US MARSHALS SERVICE | Deparment of Justice (JUS) | 216 | Judiciary |
| OND101 | DIRECTOR OFFICE OF NATIONAL DRUG CONTROL POLICY | Office of National Drug Control Policy (OND) | 216 | Judiciary |
| OND302 | DEPUTY DIRECTOR FOR DEMAND REDUCTION | Office of National Drug Control Policy (OND) | 216 | Judiciary |
| OND303 | DEPUTY DIRECTORECTOR FOR SUPPLY REDUCTION | Office of National Drug Control Policy (OND) | 216 | Judiciary |
| OND405 | ASSOCIATE DIR FOR STATE AND LOCAL AFFAIRS | Office of National Drug Control Policy (OND) | 216 | Judiciary |
| OSC501 | SPECIAL COUNSEL | Office of Special Counsel (OSC) | 216 | Judiciary |
| CNS301 | DIRECTOR CORPORATION FOR NATIONAL SERVICE | Corporation for National Service (CNS) | 217 | Labor and Human Resources |
| CNS304 | PRESIDENT AND CHIEF EXECUTIVE OFFICER CORPORATION FOR NATIONAL SERVICE | Corporation for National Service (CNS) | 217 | Labor and Human Resources |
| CNS402 | ASSOCIATE DIRECTOR FOR DOMESTIC AND ANTI-POVERTY OPERS | Corporation for National Service (CNS) | 217 | Labor and Human Resources |
| CNS403 | DEPUTY DIRECTOR | Corporation for National Service (CNS) | 217 | Labor and Human Resources |
| CNS404 | CHIEF FINANCIAL OFFICER | Corporation for National Service (CNS) | 217 | Labor and Human Resources |
| CNS405 | INSPECTOR GENERAL | Corporation for National Service (CNS) | 217 | Labor and Human Resources |
| CNS406 | MANAGING DIRECTOR | Corporation for National Service (CNS) | 217 | Labor and Human Resources |
| EDU418 | Under SECRETARY | Department of Education (EDU) | 217 | Labor and Human Resources |
| EDU101 | SECRETARY | Department of Education (EDU) | 217 | Labor and Human Resources |
| EDU202 | DEPUTY SECRETARY OF EDUCATION | Department of Education (EDU) | 217 | Labor and Human Resources |
| EDU403 | Assistant SECRETARY FOR CIVIL RIGHTS | Department of Education (EDU) | 217 | Labor and Human Resources |
| EDU406 | Assistant SECRETARY FOR INTERGOVERNMENTAL AND INTERAGENCY AFFAIRS | Department of Education (EDU) | 217 | Labor and Human Resources |
| EDU407 | Assistant SECRETARY FOR LEGISLATION AND CONGRESSIONAL AFFAIRS | Department of Education (EDU) | 217 | Labor and Human Resources |
| EDU408 | Assistant SECRETARY FOR MANAGEMENT | Department of Education (EDU) | 217 | Labor and Human Resources |
| EDU409 | Assistant SECRETARY FOR POLICY AND PLANNING | Department of Education (EDU) | 217 | Labor and Human Resources |
| EDU413 | CHIEF FINANCIAL OFFICER | Department of Education (EDU) | 217 | Labor and Human Resources |
| EDU416 | GENERAL COUNSEL | Department of Education (EDU) | 217 | Labor and Human Resources |
| EDU417 | INSPECTOR GENERAL | Department of Education (EDU) | 217 | Labor and Human Resources |
| EDU519 | DEP Under SECRETARY FOR INTERGOVT AND INTERAGENCY AF | Department of Education (EDU) | 217 | Labor and Human Resources |
| EDU405 | Assistant SECRETARY FOR ELEMENTARY AND SECONDARY EDUCATION | Department of Education (EDU) | 217 | Labor and Human Resources |
| EDU404 | Assistant SECRETARY FOR EDUCATIONAL RESEARCH AND IMPROVEMENT | Department of Education (EDU) | 217 | Labor and Human Resources |
| EDU414 | COMMISSIONER OF EDUCATION STATISTICS | Department of Education (EDU) | 217 | Labor and Human Resources |
| EDU520 | DIRECTOR NATIONAL INST ON DISABILITY AND REHUB RSCH | Department of Education (EDU) | 217 | Labor and Human Resources |
| EDU410 | Assistant SECRETARY FOR POSTSECONDARY EDUCATION | Department of Education (EDU) | 217 | Labor and Human Resources |
| EDU415 | COMMISSIONER REHABILITATION SERVICES ADMINISTRATION | Department of Education (EDU) | 217 | Labor and Human Resources |
| EDU411 | Assistant SECRETARY FOR SPECIAL EDUCATION AND REHABILITATIVE SERVICES | Department of Education (EDU) | 217 | Labor and Human Resources |
| EDU412 | Assistant SECRETARY FOR VOCATIONAL AND ADULT EDUCATION | Department of Education (EDU) | 217 | Labor and Human Resources |
| FMC301 | DIRECTOR | Federal Maritime Commission | 217 | Health, Education, Labor, and Pensions |
| HHS406 | Assistant SECRETARY ADMINISTRATOR FOR CHILDREN AND FAMILIES | Department of Health and Human Services (HHS) | 217 | Health, Education, Labor, and Pensions |
| HHS522 | COMMISSIONER ADMINSTRATION FOR CHILDREN YOUTH AND FAMILIES | Department of Health and Human Services (HHS) | 217 | Health, Education, Labor, and Pensions |
| HHS403 | ADMINISTRATOR HEALTH CARE FINANCING ADMINISTRATION | Department of Health and Human Services (HHS) | 217 | Health, Education, Labor, and Pensions |
| HHS413 | COMMISSIONER OF FOOD AND DRUG ADMINISTRATION | Department of Health and Human Services (HHS) | 217 | Health, Education, Labor, and Pensions |
| HHS412 | Assistant SECRETARY FOR HEALTH | Department of Health and Human Services (HHS) | 217 | Health, Education, Labor, and Pensions |
| HHS420 | SURGEON GENERAL | Department of Health and Human Services (HHS) | 217 | Health, Education, Labor, and Pensions |
| HHS101 | SECRETARY, HEALTH AND HUMAN SERVICES | Department of Health and Human Services (HHS) | 217 | Health, Education, Labor, and Pensions |
| HHS202 | DEPUTY SECRETARY, DEPARTMENT OF HEALTH AND HUMAN SERVICES | Department of Health and Human Services (HHS) | 217 | Health, Education, Labor, and Pensions |
| HHS405 | Assistant SECRETARY FOR PLANNING AND EVALUATION | Department of Health and Human Services (HHS) | 217 | Health, Education, Labor, and Pensions |
| HHS407 | Assistant SECRETARY FOR PUBLIC AFFAIRS | Department of Health and Human Services (HHS) | 217 | Health, Education, Labor, and Pensions |
| HHS408 | Assistant SECRETARY FOR AGING (COMMISSIONER FOR AGING) | Department of Health and Human Services (HHS) | 217 | Health, Education, Labor, and Pensions |
| HHS409 | Assistant SECRETARY FOR BUD TECH FNAN | Department of Health and Human Services (HHS) | 217 | Health, Education, Labor, and Pensions |
| HHS410 | Assistant SECRETARY FOR HUMAN DEV SERVICES | Department of Health and Human Services (HHS) | 217 | Health, Education, Labor, and Pensions |
| HHS418 | GENERAL COUNSEL | Department of Health and Human Services (HHS) | 217 | Health, Education, Labor, and Pensions |
| HHS419 | INSPECTOR GENERAL | Department of Health and Human Services (HHS) | 217 | Health, Education, Labor, and Pensions |
| HHS521 | COMMISSIONER ADM FOR NATIVE AMERICANS | Department of Health and Human Services (HHS) | 217 | Health, Education, Labor, and Pensions |
| HHS416 | DIRECTOR INDIAN HEALTH SERVICE | Department of Health and Human Services (HHS) | 217 | Health, Education, Labor, and Pensions |
| HHS417 | DIRECTOR, NAT'L INSTITUTE OF HEALTH | Department of Health and Human Services (HHS) | 217 | Health, Education, Labor, and Pensions |
| HHS404 | ADMR SUBSTANCE ABUSE AND MENTAL HEALTH SERVICE | Department of Health and Human Services (HHS) | 217 | Health, Education, Labor, and Pensions |
| HHS415 | COMMISSIONER SOCIAL SECURITY ADM | Department of Health and Human Services (HHS) | 217 | Health, Education, Labor, and Pensions |
| LAB416 | COMMISSIONER OF LABOR STATISTICS | Department of Labor (LAB) | 217 | Labor and Human Resources |
| LAB406 | Assistant SECRETARY FOR EMPLOYEE BENEFITS SECURITY ADMINISTRATION | Department of Labor (LAB) | 217 | Labor and Human Resources |
| LAB408 | Assistant SECRETARY FOR EMPLOYMENT STANDARDS | Department of Labor (LAB) | 217 | Labor and Human Resources |
| LAB407 | Assistant SECRETARY FOR EMPLOYMENT AND TRAINING | Department of Labor (LAB) | 217 | Labor and Human Resources |
| LAB101 | SECRETARY OF LABOR | Department of Labor (LAB) | 217 | Labor and Human Resources |
| LAB202 | DEPUTY SECRETARY OF LABOR | Department of Labor (LAB) | 217 | Labor and Human Resources |
| LAB404 | Assistant SECRETARY FOR ADMINISTRATION AND MANAGEMENT | Department of Labor (LAB) | 217 | Labor and Human Resources |
| LAB405 | Assistant SECRETARY FOR CONGRESSIONAL AND INTERGOVERONMENTAL AFFAIRS | Department of Labor (LAB) | 217 | Labor and Human Resources |
| LAB411 | Assistant SECRETARY FOR POLICY | Department of Labor (LAB) | 217 | Labor and Human Resources |
| LAB412 | Assistant SECRETARY FOR PUBLIC AFFAIRS | Department of Labor (LAB) | 217 | Labor and Human Resources |
| LAB413 | Assistant SECRETARY FOR THE AMERICAN WORKPLACE | Department of Labor (LAB) | 217 | Labor and Human Resources |
| LAB415 | CHIEF FINANCIAL OFFICER | Department of Labor (LAB) | 217 | Labor and Human Resources |
| LAB418 | INSPECTOR GENERAL | Department of Labor (LAB) | 217 | Labor and Human Resources |
| LAB419 | SOLICITOR OF LABOR | Department of Labor (LAB) | 217 | Labor and Human Resources |
| LAB409 | Assistant SECRETARY FOR LABOR MGT STANDARDS | Department of Labor (LAB) | 217 | Labor and Human Resources |
| LAB403 | Assistant SECRETARTY FOR LABOR FOR MINE SAFETY AND HEALTH | Department of Labor (LAB) | 217 | Labor and Human Resources |
| LAB410 | Assistant SECRETARY FOR OCCUPATIONAL SAFETY AND HEALTH | Department of Labor (LAB) | 217 | Labor and Human Resources |
| LAB414 | Assistant SECRETARY FOR VETERANS EMPLOYMENT AND TRAINING | Department of Labor (LAB) | 217 | Labor and Human Resources |
| LAB417 | DIRECTOR OF THE WOMEN'S BUREAU | Department of Labor (LAB) | 217 | Labor and Human Resources |
| LAB520 | ADMINISTRATOR WAGE AND HOUR | Department of Labor (LAB) | 217 | Labor and Human Resources |
| NFA301 | CHAIRMAN NATL ENDOWMENT FOR THE ARTS | National Endowment of the Arts (NFA) | 217 | Labor and Human Resources |
| NFA302 | CHAIRMAN NATL ENDOWMENT FOR THE HUMANITIES | National Endowment of the Arts (NFA) | 217 | Labor and Human Resources |
| NFA501 | DIRECTOR INSTITUE OF MUSEUM AND LIBRARY SERVICES | National Endowment of the Arts (NFA) | 217 | Labor and Human Resources |
| NSF201 | DIRECTOR NATIONAL SCIENCE FOUNDATION | National Science Foundation (NSF) | 217 | Labor and Human Resources |
| NSF302 | DEPUTY DIRECTOR NATIONAL SCIENCE FOUNDATION | National Science Foundation (NSF) | 217 | Labor and Human Resources |
| SA101 | COMMISSIONER SOCIAL SECURITY ADMINISTRATION | Social Security Administraiton (SSA) | 217 | Labor and Human Resources |
| SA202 | DEPUTY COMMISSIONER OF SOCIAL SECURITY | Social Security Administraiton (SSA) | 217 | Labor and Human Resources |
| SA403 | INSPECTOR GENERAL | Social Security Administraiton (SSA) | 217 | Labor and Human Resources |
| SB301 | ADMINISTRATOR SBA | Small Business Administration (SBA) | 219 | Small Business and Entrepreneurship |
| SB402 | CHIEF COUNSEL FOR ADVOCACY | Small Business Administration (SBA) | 219 | Small Business and Entrepreneurship |
| SB403 | DEPUTY ADMINISTRATOR | Small Business Administration (SBA) | 219 | Small Business and Entrepreneurship |
| SB404 | INSPECTOR GENERAL | Small Business Administration (SBA) | 219 | Small Business and Entrepreneurship |
| VET305 | Under SECRETARY MEMORIAL AFFAIRS | Department of Veterans Affairs (VET) | 220 | Veterans' Affairs |
| VET403 | DIRECTOR NATIONAL CEMETERY SYSTEM | Department of Veterans Affairs (VET) | 220 | Veterans' Affairs |
| VET414 | CHAIRMAN, BOARD OF VETERANS APPEALS | Department of Veterans Affairs (VET) | 220 | Veterans' Affairs |
| VET303 | Under SECRETARY FOR BENEFITS | Department of Veterans Affairs (VET) | 220 | Veterans' Affairs |
| VET101 | SECRETARY OF VETERANS AFFAIRS | Department of Veterans Affairs (VET) | 220 | Veterans' Affairs |
| VET202 | DEPUTY SECRETARY OF VETERANS AFFAIRS | Department of Veterans Affairs (VET) | 220 | Veterans' Affairs |
| VET406 | Assistant SECRETARY FOR ACQUISITION AND FACILITIES | Department of Veterans Affairs (VET) | 220 | Veterans' Affairs |
| VET407 | Assistant SECRETARY FOR CONGRESSIONAL AND LEGISLATIVE AFFAIRS | Department of Veterans Affairs (VET) | 220 | Veterans' Affairs |
| VET408 | Assistant SECRETARY FOR HUMAN RESOURCES AND ADMINISTRATION | Department of Veterans Affairs (VET) | 220 | Veterans' Affairs |
| VET409 | Assistant SECRETARY FOR INFO RESOURCES MANAGEMENT | Department of Veterans Affairs (VET) | 220 | Veterans' Affairs |
| VET410 | Assistant SECRETARY FOR MANAGEMENT | Department of Veterans Affairs (VET) | 220 | Veterans' Affairs |
| VET411 | Assistant SECRETARY FOR POLICY AND PLANNING | Department of Veterans Affairs (VET) | 220 | Veterans' Affairs |
| VET412 | Assistant SECRETARY FOR PUBLIC AND INTERGOVERNMENTAL AFFAIRS | Department of Veterans Affairs (VET) | 220 | Veterans' Affairs |
| VET413 | Assistant SECRETARY FOR VA LIAISON PROG COORDINAT | Department of Veterans Affairs (VET) | 220 | Veterans' Affairs |
| VET415 | GENERAL COUNSEL | Department of Veterans Affairs (VET) | 220 | Veterans' Affairs |
| VET416 | INSPECTOR GENERAL | Department of Veterans Affairs (VET) | 220 | Veterans' Affairs |
| VET304 | Under SECRETARY FOR HEALTH | Department of Veterans Affairs (VET) | 220 | Veterans' Affairs |
| INT408 | Assistant SECRETARY OF INDIAN AFFAIRS | Department of the Interior (INT) | 252 | Indian Affairs (Select Committee) |
| INT412 | CHAIRMAN, NATIONAL INDIAN GAMING COMMISSION | Department of the Interior (INT) | 252 | Indian Affairs (Select Committee) |
| INT520 | SPECIAL TRUSTEE AMERICAN INDIANS | Department of the Interior (INT) | 252 | Indian Affairs (Select Committee) |
| CIA201 | DIRECTOR, CENTRAL INTELLIGENCE AGENCY | Central Intelligence Agency (CIA) | 253 | Intelligence (Select Committee) |
| CIA302 | DEPUTY DIRECTOR | Central Intelligence Agency (CIA) | 253 | Intelligence (Select Committee) |
| CIA303 | DEPUTY DIRECTOR - COMMUNITY MANAGEMENT | Central Intelligence Agency (CIA) | 253 | Intelligence (Select Committee) |
| CIA403 | Assistant DIRECTOR FOR ADMINISTRATION | Central Intelligence Agency (CIA) | 253 | Intelligence (Select Committee) |
| CIA404 | GENERAL COUNSEL | Central Intelligence Agency (CIA) | 253 | Intelligence (Select Committee) |
| CIA405 | INSPECTOR GENERAL | Central Intelligence Agency (CIA) | 253 | Intelligence (Select Committee) |
